# Supplementary material for: Environmental Sampling Methods for Detection of Salmonella Infections in Laying Hens: A Systematic Review and Meta-Analysis
Source: MDPI journal article supplement (doi:10.3390/microorganisms11082100), 2023-08-17
Supplement: s1 [file s1]

Table S1. Overview of 114 studies identified for full text screening, indicating which one was included (1) for particular analysis and reasons for exclusions.

| Author                                                       | Eligible for qualitative analysis<br>Q1, Q2 | Eligible for quantitative analysis<br>Q3 | Excluded | Reasons for exclusion for qualitative/quantitative analysis | Eligible for ISO method question<br>Q4 | Reason for exclusion ISO method question |
|--------------------------------------------------------------|---------------------------------------------|------------------------------------------|----------|-------------------------------------------------------------|----------------------------------------|------------------------------------------|
| Adesiyun et al., (2014)                                      | 1                                           | 0                                        | 0        |                                                             | 1                                      |                                          |
| Agunos et al., (2021)                                        | 1                                           | 0                                        | 0        |                                                             | 1                                      |                                          |
| Aimey et al., (2013)                                         | 1                                           | 1                                        | 0        |                                                             | 1                                      |                                          |
| Al-Nakhli, Al-Ogaily, & Nassar, (1999)                       | 0                                           | 0                                        | 1        | Not only for laying hens                                    |                                        |                                          |
| Altekruse, Koehler, Hickman-Brenner, Tauxe, & Ferris, (1993) | 0                                           | 0                                        | 1        | Study on phages                                             |                                        |                                          |
| Andoh et al., (2016)                                         | 1                                           | 0                                        | 0        |                                                             | 1                                      |                                          |
| Arnold, Carrique-Mas, & Davies, (2010)                       | 1                                           | 1                                        | 0        |                                                             | 1                                      |                                          |
| Arnold, Carrique-Mas, McLaren, & Davies, (2011)              | 1                                           | 1                                        | 0        |                                                             | 1                                      |                                          |
| Arnold, Martelli, McLaren, & Davies, (2014a)                 | 1                                           | 1                                        | 0        |                                                             | 1                                      |                                          |
| Arnold, Martelli, McLaren, & Davies, (2014b)                 | 1                                           | 1                                        | 0        |                                                             | 0                                      | No details described for culture         |
| Ayachi, Alloui, Bennoune, & Kassah-Laouar, (2010)            | 0                                           | 0                                        | 1        | No laying hens                                              |                                        |                                          |
| Bouzidi et al., (2012)                                       | 1                                           | 0                                        | 0        |                                                             | 1                                      |                                          |
| Carli, Eygor, & Caner, (2001)                                | 0                                           | 0                                        | 1        | No environmental samples                                    |                                        |                                          |
| Carrique-Mas, Breslin, Snow, et al., (2008)                  | 1                                           | 0                                        | 0        |                                                             | 1                                      |                                          |
| Carrique-Mas, Breslin, Sayers, et al., (2008)                | 1                                           | 0                                        | 0        |                                                             | 1                                      |                                          |
| Castellan et al., (2004)                                     | 1                                           | 0                                        | 0        |                                                             | 1                                      |                                          |
| Charlton et al., (2005)                                      | 1                                           | 0                                        | 0        |                                                             | 1                                      |                                          |
| Chemaly et al., (2009)                                       | 0                                           | 0                                        | 1        | No environmental samples                                    |                                        |                                          |
| Chousalkar, Gole, Caraguel, & Rault, (2016)                  | 1                                           | 0                                        | 0        |                                                             | 1                                      |                                          |
| Clep, (2014)                                                 | 0                                           | 0                                        | 1        | No laying hens                                              |                                        |                                          |

|                                                                          |   |   |   |                                                      |   |  |
|--------------------------------------------------------------------------|---|---|---|------------------------------------------------------|---|--|
| Crabb, Gilkerson, & Browning, (2019)                                     | 1 | 0 | 0 |                                                      | 1 |  |
| Dailey, Niemeier, Elkhoraibi, Senties-Cue, & Pitesky, (2017)             | 0 | 0 | 1 | Samples outside farm                                 |   |  |
| R. H. Davies et al., (1997)                                              | 0 | 0 | 1 | Hatchery                                             |   |  |
| R. Davies & Breslin, (2001)                                              | 1 | 1 | 0 |                                                      | 1 |  |
| R. H. Davies & M. F. Breslin, (2003)                                     | 1 | 1 | 0 |                                                      | 1 |  |
| R. Davies, Liebana, & Breslin, (2003)                                    | 1 | 1 | 0 |                                                      | 1 |  |
| R. Davies & M. Breslin, (2003)                                           | 1 | 1 | 0 |                                                      | 1 |  |
| R. Davies & Breslin, (2004)                                              | 1 | 0 | 0 |                                                      | 1 |  |
| Davison, Benson, & Eckroade, (1995)                                      | 1 | 0 | 0 |                                                      | 1 |  |
| Davison, Benson, Henzler, & Eckroade, (1999)                             | 1 | 0 | 0 |                                                      | 1 |  |
| Denagamage et al., (2016)                                                | 1 | 0 | 0 |                                                      | 1 |  |
| Denagamage, Jayarao, Wallner-Pendleton, Patterson, & Kariyawasam, (2017) | 0 | 0 | 1 | No original data                                     |   |  |
| Dewaele et al., (2012)                                                   | 1 | 0 | 0 |                                                      | 1 |  |
| Diker et al., (2020)                                                     | 1 | 0 | 0 |                                                      | 1 |  |
| Fagbamila et al., (2017)                                                 | 1 | 0 | 0 |                                                      | 1 |  |
| Fotariya, Brahmabhatt, Nayak, & Patel, (2014)                            | 0 | 0 | 1 | Study for virulence genes                            |   |  |
| Garber, Smeltzer, Fedorka-Cray, Ladely, & Ferris, (2003)                 | 1 | 0 | 0 |                                                      | 1 |  |
| Garcia, Anderson, Guard, Gast, & Jones, (2021)                           | 1 | 0 | 0 |                                                      | 1 |  |
| Gast, Mitchell, & Holt, (2004)                                           | 0 | 0 | 1 | Different aim: Comparison of different culture media |   |  |
| Gole, Caraguel, Sexton, Fowler, & Chousalkar, (2014)                     | 1 | 1 | 0 |                                                      | 1 |  |
| Gole, Torok, Sexton, Caraguel, & Chousalkar, (2014)                      | 1 | 1 | 0 |                                                      | 1 |  |
| Gole et al., (2017)                                                      | 1 | 1 | 0 |                                                      | 1 |  |

|                                                     |   |   |   |                                            |   |                                  |
|-----------------------------------------------------|---|---|---|--------------------------------------------|---|----------------------------------|
| Haque et al., (2021)                                | 1 | 0 | 0 |                                            | 1 |                                  |
| Hao, Li, Wang, Zhang, & Cao, (2013)                 | 1 | 0 | 0 |                                            | 1 |                                  |
| Hardy et al., (2019)                                | 0 | 0 | 1 | Hatchery, backyard flock                   |   |                                  |
| Hasan & Lafta, (2021)                               | 1 | 0 | 0 |                                            | 1 |                                  |
| Henzler, Ebel, Sanders, Kradel, & Mason, (1994)     | 1 | 0 | 0 |                                            | 1 |                                  |
| Henzler & Opitz, (1992)                             | 1 | 0 | 0 |                                            | 1 |                                  |
| Henzler, Kradel, & Sisco, (1998)                    | 1 | 0 | 0 |                                            | 1 |                                  |
| Humbert, Carraminana, Lalande, & Salvat, (1997)     | 0 | 0 | 1 | Study at experimental facility             |   |                                  |
| Huneau-Salaun et al., (2009)                        | 1 | 0 | 0 |                                            | 1 |                                  |
| Im et al., (2015)                                   | 1 | 0 | 0 |                                            | 1 |                                  |
| F. T. Jones, Rives, & Carey, (1995)                 | 1 | 0 | 0 |                                            | 1 |                                  |
| D. R. Jones, Anderson, & Guard, (2012)              | 1 | 0 | 0 |                                            | 1 |                                  |
| D. R. Jones et al., (2015)                          | 1 | 0 | 0 |                                            | 1 |                                  |
| D. R. Jones et al., (2016)                          | 1 | 0 | 0 |                                            | 1 |                                  |
| Jouy et al., (2005)                                 | 1 | 0 | 0 |                                            | 1 |                                  |
| Kahya, Eyigor, & Carl, (2013)                       | 0 | 0 | 1 | No laying hens                             |   |                                  |
| Kinde et al., (1996)                                | 1 | 0 | 0 |                                            | 1 |                                  |
| Kinde et al., (2004)                                | 1 | 0 | 0 |                                            | 0 | No details described for culture |
| Kinde et al., (2005)                                | 1 | 0 | 0 |                                            | 1 |                                  |
| Kinde et al., (2015)                                | 0 | 0 | 1 | Spiking experiments                        |   |                                  |
| Kingsbury, Thom, Erskine, Olsen, & Soboleva, (2019) | 1 | 0 | 0 |                                            | 1 |                                  |
| Klinkenberg, Thomas, Artavia, & Bouma, (2011)       | 0 | 0 | 1 | Lack of raw data                           |   |                                  |
| Kottwitz et al., (2013)                             | 0 | 0 | 1 | Different aim: serotype Salmonella strains |   |                                  |
| Koutsoumanis et al., (2019)                         | 0 | 0 | 1 | No original data                           |   |                                  |
| Leon-Velarde et al., (2004)                         | 1 | 0 | 0 |                                            | 1 |                                  |

|                                                                                   |   |   |   |                                     |   |                                  |
|-----------------------------------------------------------------------------------|---|---|---|-------------------------------------|---|----------------------------------|
| Li, Liu, Li, Xu, & Zheng, (2018)                                                  | 1 | 1 | 0 |                                     | 1 |                                  |
| Lopašovský et al., (2015)                                                         | 1 | 0 | 0 |                                     | 0 | No details described for culture |
| Mahe et al., (2008)                                                               | 1 | 0 | 0 |                                     | 1 |                                  |
| Matsumoto, Miyama, & Murakami, (2001)                                             | 1 | 1 | 0 |                                     | 1 |                                  |
| McWhorter, Davos, & Chousalkar, (2015)                                            | 0 | 0 | 1 | No original data                    |   |                                  |
| McWhorter & Chousalkar, (2020)                                                    | 1 | 0 | 0 |                                     | 1 |                                  |
| Moffatt et al., (2017)                                                            | 0 | 0 | 1 | No original data                    |   |                                  |
| Moraes et al., (2016)                                                             | 1 | 0 | 0 |                                     | 1 |                                  |
| Murakami, Horikawa, Ito, & Otsuki, (2001)                                         | 1 | 0 | 0 |                                     | 1 |                                  |
| Murase et al., (2001)                                                             | 1 | 0 | 0 |                                     | 1 |                                  |
| Murase, Miyahara, Sato, Otsuki, & Holt, (2006)                                    | 0 | 0 | 1 | Environmental samples not specified |   |                                  |
| Mutalib, McDonough, Shin, Patten, & Lein, (1992)                                  | 1 | 0 | 0 |                                     | 1 |                                  |
| Pajic et al., (2015)                                                              | 0 | 0 | 1 | No environmental samples            |   |                                  |
| Pieskus, Kazeniauskas, Butrimaite-Ambrozeviciene, Stanevicius, & Mauricas, (2008) | 1 | 0 | 0 |                                     | 1 |                                  |
| Pitesky, Charlton, Bland, & Rolfe, (2013)                                         | 1 | 0 | 0 |                                     | 0 | No details described for culture |
| Poppe, Irwin, Forsberg, Clarke, & Oggel, (1991)                                   | 1 | 0 | 0 |                                     | 1 |                                  |
| Pulido-Landinez, Sanchez-Ingunza, Guard, & Nascimento, (2014)                     | 0 | 0 | 1 | No environmental samples            |   |                                  |
| Rodriguez, Fandino, Donado, Guzman, & Verjan, (2015)                              | 1 | 0 | 0 |                                     | 1 |                                  |
| Salazar et al., (2019)                                                            | 1 | 0 | 0 |                                     | 1 |                                  |
| Saravanan et al., (2015)                                                          | 1 | 0 | 0 |                                     | 1 |                                  |
| Sasaki et al., (2012)                                                             | 1 | 0 | 0 |                                     | 1 |                                  |

|                                                                     |   |   |   |                                   |   |                                  |
|---------------------------------------------------------------------|---|---|---|-----------------------------------|---|----------------------------------|
| Sasipreeyajan, Jerngklinchan, Koowatananukul, & Saitanu, (1996)     | 1 | 0 | 0 |                                   | 1 |                                  |
| Schulz et al., (2011)                                               | 1 | 0 | 0 |                                   | 1 |                                  |
| Sevilla-Navarro et al., (2018)                                      | 0 | 0 | 1 | Different aim: study on Autophage |   |                                  |
| P. Sharma et al., (2018)                                            | 1 | 0 | 0 |                                   | 1 |                                  |
| S. Sharma, Fowler, Pant, Singh, & Wilkins, (2021)                   | 1 | 0 | 0 |                                   | 1 |                                  |
| Sheldon, Li, Payne, Santos, & Anderson, (2006)                      | 1 | 0 | 0 |                                   | 1 |                                  |
| Shirota, Umali, Suzuki, & Katoh, (2012)                             | 1 | 0 | 0 |                                   | 1 |                                  |
| Singh, Yadav, Tripathi, & Singh, (2013)                             | 1 | 0 | 0 |                                   | 0 | No details described for culture |
| Sivaramalingam, McEwen, Pearl, Ojkic, & Guerin, (2013)              | 0 | 0 | 1 | No laying hens                    |   |                                  |
| Snow et al., (2007)                                                 | 1 | 0 | 0 |                                   | 1 |                                  |
| Sodagari et al., (2020)                                             | 1 | 0 | 0 |                                   | 1 |                                  |
| Soria et al., (2017)                                                | 1 | 1 | 0 |                                   | 1 |                                  |
| St. Amand, Cassis, King, & Christianson, (2017)                     | 1 | 0 | 0 |                                   | 1 |                                  |
| Stocki et al., (2007)                                               | 1 | 0 | 0 |                                   | 0 | No details described for culture |
| Sylejmani, Musliu, Ramadani, Sparagano, & Hamidi, (2016)            | 1 | 0 | 0 |                                   | 1 |                                  |
| Trawinska, Saba, Wdowiak, Ondrasovicova, & Nowakowicz-Debek, (2008) | 0 | 0 | 1 | No laying hens                    |   |                                  |
| Van Hoorebeke et al., (2009)                                        | 1 | 1 | 0 |                                   | 1 |                                  |
| Van Hoorebeke et al., (2010)                                        | 1 | 1 | 0 |                                   | 1 |                                  |
| Wales, Breslin, & Davies, (2006a)                                   | 1 | 0 | 0 |                                   | 1 |                                  |
| Wales, Breslin, & Davies, (2006b)                                   | 1 | 1 | 0 |                                   | 1 |                                  |

|                                                                                |   |   |   |                  |   |                                     |
|--------------------------------------------------------------------------------|---|---|---|------------------|---|-------------------------------------|
| Wallner-Pendleton, Patterson,<br>Kariyawasam, Trampel, & Denagamage,<br>(2014) | 1 | 0 | 0 |                  | 1 |                                     |
| White, Schlosser, Benson, Maddox, &<br>Hogue, (1997)                           | 1 | 0 | 0 |                  | 1 |                                     |
| Wilson, Chandry, Turner, Courtice, &<br>Fegan, (2021)                          | 1 | 0 | 0 |                  | 0 | No details described<br>for culture |
| Yamane et al., (2000)                                                          | 1 | 0 | 0 |                  | 1 |                                     |
| Zhang, Yan, & Ryser, (2006)                                                    | 1 | 0 | 0 |                  | 1 |                                     |
| Zijpp, Mollenhorst, Berentsen, & Boer,<br>(2006)                               | 0 | 0 | 1 | Discussion paper |   |                                     |

- Adesiyun, A., Webb, L., Musai, L., Louison, B., Joseph, G., Stewart-Johnson, A., . . . Rodrigo, S. (2014). Survey of Salmonella contamination in chicken layer farms in three Caribbean countries. *Journal of Food Protection*, 77(9), 1471-1480. Retrieved from <http://www.foodprotection.org>
- Agunos, A., Gow, S. P., Leger, D. F., Flockhart, L., Daignault, D., Desruisseau, A., . . . Reid-Smith, R. J. (2021). Antimicrobial resistance and recovery of Salmonella, Campylobacter, and Escherichia coli from chicken egg layer flocks in Canadian sentinel surveillance sites using 2 types of sample matrices. *Canadian Journal of Veterinary Research*, 85(1), 27-35. Retrieved from <https://www.ingentaconnect.com/contentone/cvma/cjvr/2021/00000085/00000001/art00005;jsessionid=13qoofmniinq3.x-ic-live-02#expand/collapse>
- Aimey, V., Hunte, K., Whitehall, P., Sanford, B., Trotman, M., Delgado, A., . . . Hernandez, J. (2013). Prevalence of and examination of exposure factors for Salmonella on commercial egg-laying farms in Barbados. *Preventive Veterinary Medicine*, 110(3/4), 489-496. doi:<http://dx.doi.org/10.1016/j.prevetmed.2012.12.009>
- Al-Nakhli, H. M., Al-Ogaily, Z. H., & Nassar, T. J. (1999). Representative Salmonella serovars isolated from poultry and poultry environments in Saudi Arabia. *Revue Scientifique et Technique - Office International des Epizooties*, 18(3), 700-709.
- Altekruse, S., Koehler, J., Hickman-Brenner, F., Tauxe, R. V., & Ferris, K. (1993). A comparison of Salmonella enteritidis phage types from egg-associated outbreaks and implicated laying flocks. *Epidemiology and Infection*, 110(1), 17-22. doi:<http://dx.doi.org/10.1017/S0950268800050639>
- Andoh, L. A., Dalsgaard, A., Obiri-Danso, K., Newman, M. J., Barco, L., & Olsen, J. E. (2016). Prevalence and antimicrobial resistance of Salmonella serovars isolated from poultry in Ghana. *Epidemiology and Infection*, 144(15), 3288-3299. doi:<http://dx.doi.org/10.1017/S0950268816001126>
- Arnold, M. E., Carrique-Mas, J. J., & Davies, R. H. (2010). Sensitivity of environmental sampling methods for detecting Salmonella Enteritidis in commercial laying flocks relative to the within-flock prevalence. *Epidemiology and Infection*, 138(3), 330-339. doi:<http://dx.doi.org/10.1017/S0950268809990598>
- Arnold, M. E., Carrique-Mas, J. J., McLaren, I., & Davies, R. H. (2011). A comparison of pooled and individual bird sampling for detection of Salmonella in commercial egg laying flocks. *Preventive Veterinary Medicine*, 99(2/4), 176-184. doi:<http://dx.doi.org/10.1016/j.prevetmed.2010.12.007>
- Arnold, M. E., Martelli, F., McLaren, I., & Davies, R. H. (2014a). Estimation of the rate of egg contamination from Salmonella-infected chickens. *Zoonoses and Public Health*, 61(1), 18-27. doi:<http://dx.doi.org/10.1111/zph.12038>
- Arnold, M. E., Martelli, F., McLaren, I., & Davies, R. H. (2014b). Estimation of the sensitivity of environmental sampling for detection of Salmonella in commercial layer flocks post-introduction of national control programmes. *Epidemiology and Infection*, 142(5), 1061-1069. doi:<http://dx.doi.org/10.1017/S0950268813002173>
- Ayachi, A., Alloui, N., Bennoune, O., & Kassah-Laouar, A. (2010). Survey of Salmonella serovars in broilers and laying breeding reproducers in Eastern Algeria. *Journal of Infection in Developing Countries*, 4(2), 103-106. doi:10.3855/jidc.562
- Bouzidi, N., Aoun, L., Zeghdoudi, M., Bensouilah, M., Elgroud, R., Oucief, I., . . . Millemann, Y. (2012). Salmonella contamination of laying-hen flocks in two regions of Algeria. *Food Research International*, 45(2), 897-904. doi:<http://dx.doi.org/10.1016/j.foodres.2011.05.027>
- Carli, K. T., Eygor, A., & Caner, V. (2001). Prevalence of Salmonella serovars in chickens in Turkey. *Journal of Food Protection*, 64(11), 1832-1835.
- Carrique-Mas, J. J., Breslin, M., Sayers, A. R., McLaren, I., Arnold, M., & Davies, R. (2008). Comparison of environmental sampling methods for detecting Salmonella in commercial laying flocks in the UK. *Letters in Applied Microbiology*, 47(6), 514-519. doi:<http://dx.doi.org/10.1111/j.1472-765X.2008.02450.x>

- Carrique-Mas, J. J., Breslin, M., Snow, L., Arnold, M. E., Wales, A., McLaren, I., & Davies, R. H. (2008). Observations related to the Salmonella EU layer baseline survey in the United Kingdom: follow-up of positive flocks and sensitivity issues. *Epidemiology and Infection*, 136(11), 1537-1546. doi:<http://dx.doi.org/10.1017/S095026880700012X>
- Castellan, D. M., Kinde, H., Kass, P. H., Cutler, G., Breitmeyer, R. E., Bell, D. D., . . . Kune, D. R. (2004). Descriptive study of California egg layer premises and analysis of risk factors for Salmonella enterica serotype enteritidis as characterized by manure drag swabs. *Avian Diseases*, 48(3), 550-561. doi:<http://dx.doi.org/10.1637/7159-012804R1>
- Charlton, B. R., Walker, R. L., Kinde, H., Bauer, C. R., Channing-Santiago, S. E., & Farver, T. B. (2005). Comparison of a Salmonella Enteritidis-specific polymerase chain reaction assay to delayed secondary enrichment culture for the detection of Salmonella Enteritidis in environmental drag swab samples. *Avian Diseases*, 49(3), 418-422. doi:<http://dx.doi.org/10.1637/7283-092404R1.1>
- Chemaly, M., Huneau-Salaun, A., Labbe, A., Houdayer, C., Petetin, I., & Fravallo, P. (2009). Isolation of Salmonella enterica in laying-hen flocks and assessment of eggshell contamination in France. *Journal of Food Protection*, 72(10), 2071-2077. Retrieved from <http://www.foodprotection.org>
- Chousalkar, K., Gole, V., Caraguel, C., & Rault, J. L. (2016). Chasing Salmonella Typhimurium in free range egg production system. *Veterinary Microbiology*, 192, 67-72. doi:<http://dx.doi.org/10.1016/j.vetmic.2016.06.013>
- Clep, R. (2014). Frequency of Salmonella spp. relevant serovars isolated during 2009-2012 from laying hens flocks. *Lucrari Stiintifice - Universitatea de Stiinte Agricole a Banatului Timisoara, Medicina Veterinara*, 47(3), 26-30.
- Crabb, H. K., Gilkerson, J. R., & Browning, G. F. (2019). Does only the age of the hen matter in Salmonella enterica contamination of eggs? *Food Microbiology*, 77, 1-9. doi:<http://dx.doi.org/10.1016/j.fm.2018.08.006>
- Dailey, N., Niemeier, D., Elkhoraibi, C., Senties-Cue, C. G., & Pitesky, M. (2017). Descriptive survey and Salmonella surveillance of pastured poultry layer farms in California. *Poultry Science*, 96(4), 957-965. Retrieved from <https://academic.oup.com/ps/article/96/4/957/2282770/Descriptive-survey-and-Salmonella-surveillance-of>
- Davies, R., & Breslin, M. (2001). Environmental contamination and detection of Salmonella enterica serovar enteritidis in laying flocks. *Veterinary Record*, 149(23), 699-704.
- Davies, R., & Breslin, M. (2003). Effects of vaccination and other preventive methods for Salmonella Enteritidis on commercial laying chicken farms. *Veterinary Record*, 153(22), 673-677.
- Davies, R., & Breslin, M. (2004). Observations on Salmonella contamination of eggs from infected commercial laying flocks where vaccination for Salmonella enterica serovar Enteritidis had been used. *Avian Pathology*, 33(2), 133-144. doi:<http://dx.doi.org/10.1080/03079450310001652040>
- Davies, R., Liebana, E., & Breslin, M. (2003). Investigation of the distribution and control of Salmonella enterica serovar Enteritidis PT6 in layer breeding and egg production. *Avian Pathology*, 32(3), 227-237. doi:<http://dx.doi.org/10.1080/0307945031000097822>
- Davies, R. H., & Breslin, M. F. (2003). Observations on the distribution and persistence of Salmonella enterica serovar Enteritidis phage type 29 on a cage layer farm before and after the use of competitive exclusion treatment. *British Poultry Science*, 44(4), 551-557. doi:<http://dx.doi.org/10.1080/00071660310001618307>
- Davies, R. H., Nicholas, R. A. J., McLaren, I. M., Corkish, J. D., Lanning, D. G., & Wray, C. (1997). Bacteriological and serological investigation of persistent Salmonella enteritidis infection in an integrated poultry organisation. *Veterinary Microbiology*, 58(2/4), 277-293. doi:[http://dx.doi.org/10.1016/S0378-1135\(97\)00157-0](http://dx.doi.org/10.1016/S0378-1135(97)00157-0)
- Davison, S., Benson, C. E., & Eckroade, R. J. (1995). Comparison of environmental monitoring protocols for the detection of Salmonella in poultry houses. *Avian Diseases*, 39(3), 475-479. doi:<http://dx.doi.org/10.2307/1591798>
- Davison, S., Benson, C. E., Henzler, D. J., & Eckroade, R. J. (1999). Field observations with Salmonella enteritidis bacterins. *Avian Diseases*, 43(4), 664-669. doi:<http://dx.doi.org/10.2307/1592735>



- Denagamage, T. N., Jayarao, B. M., Wallner-Pendleton, E., Patterson, P. H., & Kariyawasam, S. (2017). A retrospective study of Salmonella Enteritidis isolated from commercial layer flocks. *Avian Diseases*, 61(3), 330-334. doi:<http://dx.doi.org/10.1637/11590-011817-RegR>
- Denagamage, T. N., Patterson, P., Wallner-Pendleton, E., Trampel, D., Shariat, N., Dudley, E. G., . . . Subhashinie, K. (2016). Longitudinal monitoring of successive commercial layer flocks for Salmonella enterica serovar Enteritidis. *Foodborne Pathogens and Disease*, 13(11), 618-625. Retrieved from <http://online.liebertpub.com/fpd>
- Dewaele, I., Meirhaeghe, H. v., Rasschaert, G., Vanrobaeys, M., Graef, E. d., Herman, L., . . . Reu, K. d. (2012). Persistent Salmonella Enteritidis environmental contamination on layer farms in the context of an implemented national control program with obligatory vaccination. *Poultry Science*, 91(2), 282-291. doi:<http://dx.doi.org/10.3382/ps.2011-01673>
- Diker, K. S., Goncuoglu, M., Sahin, G., Akan, M., Gurcan, I. S., Mustak, H. K., . . . iftci, M. M. (2020). Base study for the establishment of national Salmonella control program in hatching farms and table eggs in Turkey. *Turkish Journal of Veterinary & Animal Sciences*, 44(2), 343-349. doi:<http://dx.doi.org/10.3906/vet-1908-2>
- Fagbamila, I. O., Barco, L., Mancin, M., Kwaga, J., Ngulukun, S. S., Zavagnin, P., . . . Muhammad, M. (2017). Salmonella serovars and their distribution in Nigerian commercial chicken layer farms. *PLoS ONE*, 12(3), e0173097. doi:<http://dx.doi.org/10.1371/journal.pone.0173097>
- Fotariya, M. H., Brahmabhatt, M. N., Nayak, J. B., & Patel, B. D. (2014). Virulence genes characterization of Salmonella serovars isolated from eggs and poultry house environment. *Veterinary Practitioner*, 15(1), 86-88. Retrieved from <http://www.vetpract.in/Archives/June-2014/VP-15-1--JUNE-2014/>
- Garber, L., Smeltzer, M., Fedorka-Cray, P., Ladely, S., & Ferris, K. (2003). Salmonella enterica serotype enteritidis in table egg layer house environments and in mice in U.S. layer houses and associated risk factors. *Avian Diseases*, 47(1), 134-142. doi:[http://dx.doi.org/10.1637/0005-2086\(2003\)047\[0134:SESEIT\]2.0.CO;2](http://dx.doi.org/10.1637/0005-2086(2003)047[0134:SESEIT]2.0.CO;2)
- Garcia, J. S., Anderson, K. E., Guard, J. Y., Gast, R. K., & Jones, D. R. (2021). Impact of organic dairy cattle manure on environmental and egg microbiology of organic free-range laying hens. *Journal of Applied Poultry Research*, 30(4). doi:<http://dx.doi.org/10.1016/j.japr.2021.100189>
- Gast, R. K., Mitchell, B. W., & Holt, P. S. (2004). Evaluation of culture media for detecting airborne Salmonella enteritidis collected with an electrostatic sampling device from the environment of experimentally infected laying hens. *Poult Sci*, 83(7), 1106-1111. doi:10.1093/ps/83.7.1106
- Gole, V. C., Caraguel, C. G. B., Sexton, M., Fowler, C., & Chousalkar, K. K. (2014). Shedding of Salmonella in single age caged commercial layer flock at an early stage of lay. *International Journal of Food Microbiology*, 189, 61-66. doi:<http://dx.doi.org/10.1016/j.ijfoodmicro.2014.07.030>
- Gole, V. C., Torok, V., Sexton, M., Caraguel, C. G. B., & Chousalkar, K. K. (2014). Association between indoor environmental contamination by Salmonella enterica and contamination of eggs on layer farms. *Journal of Clinical Microbiology*, 52(9), 3250-3258. doi:<http://dx.doi.org/10.1128/JCM.00816-14>
- Gole, V. C., Woodhouse, R., Caraguel, C., Moyle, T., Rault, J. L., Sexton, M., & Chousalkar, K. (2017). Dynamics of Salmonella shedding and welfare of hens in free-range egg production systems. *Applied and Environmental Microbiology*, 83(5), e03313. doi:<http://dx.doi.org/10.1128/aem.03313-16>
- Hao, X. X., Li, B. M., Wang, C. Y., Zhang, Q., & Cao, W. (2013). Application of slightly acidic electrolyzed water for inactivating microbes in a layer breeding house. *Poultry Science*, 92(10), 2560-2566. doi:<http://dx.doi.org/10.3382/ps.2013-03117>
- Haque, A. K. M. Z., Akter, M. R., Islam, S. K. S., Jahangir, A., Neogi, S. B., Yamasaki, S., & Kabir, S. M. L. (2021). Salmonella gallinarum in small-scale commercial layer flocks: occurrence, molecular diversity and antibiogram. *Veterinary Sciences*, 8(5). doi:<http://dx.doi.org/10.3390/vetsci8050071>
- Hardy, M. C., Robertson, S. A., Sidge, J., Signs, K., Stobierski, M. G., Jones, K., . . . Hise, K. B. (2019). Environmental investigation of a multistate salmonellosis outbreak linked to live backyard

- poultry from a mail-order hatchery - Michigan, 2018. *Morbidity and Mortality Weekly Report*, 67(51/52), 1430-1431. doi:<http://dx.doi.org/10.15585/mmwr.mm675152a5>
- Hasan, T. O., & Lafta, I. J. (2021). Identification and antimicrobial susceptibility profiles of *Salmonella* spp. isolated from chicken flocks and their feed and water in karbala, Iraq. *Indian Journal of Ecology*, 48(5), 1542-1550. Retrieved from [http://indianecologicalsociety.com/society/wp-content/themes/ecology/volume\\_pdfs/1637035810.pdf](http://indianecologicalsociety.com/society/wp-content/themes/ecology/volume_pdfs/1637035810.pdf)
- Henzler, D. J., Ebel, E., Sanders, J., Kradel, D., & Mason, J. (1994). *Salmonella enteritidis* in eggs from commercial chicken layer flocks implicated in human outbreaks. *Avian Diseases*, 38(1), 37-43. doi:<http://dx.doi.org/10.2307/1591834>
- Henzler, D. J., Kradel, D. C., & Sischo, W. M. (1998). Management and environmental risk factors for *Salmonella enteritidis* contamination of eggs. *American Journal of Veterinary Research*, 59(7), 824-829. Retrieved from <https://www.scopus.com/inward/record.uri?eid=2-s2.0-0032109450&partnerID=40&md5=d0a6b15b9fbac43414fe9a57243f10b2>
- Henzler, D. J., & Opitz, H. M. (1992). The role of mice in the epizootiology of *Salmonella enteritidis* infection on chicken layer farms. *Avian Diseases*, 36(3), 625-631. doi:<http://dx.doi.org/10.2307/1591757>
- Humbert, F., Carraminana, J. J., Lalande, F., & Salvat, G. (1997). Bacteriological monitoring of *Salmonella enteritidis* carrier birds after decontamination using enrofloxacin, competitive exclusion and movement of birds. *Veterinary Record*, 141(12), 297-299.
- Huneau-Salaun, A., Chemaly, M., Bouquin, S. I., Lalande, F., Petetin, I., Rouxel, S., . . . Rose, N. (2009). Risk factors for *Salmonella enterica* subsp. *enterica* contamination in 519 French laying hen flocks at the end of the laying period. *Preventive Veterinary Medicine*, 89(1/2), 51-58. doi:<http://dx.doi.org/10.1016/j.prevetmed.2009.01.006>
- Im, M., Jeong, S., Kwon, Y., Jeong, O., Kang, M., & Lee, Y. (2015). Prevalence and characteristics of *Salmonella* spp. isolated from commercial layer farms in Korea. *Poultry Science*, 94(7), 1691-1698. Retrieved from <http://ps.oxfordjournals.org/content/94/7/1691.full>
- Jones, D. R., Anderson, K. E., & Guard, J. Y. (2012). Prevalence of coliforms, *Salmonella*, *Listeria*, and *Campylobacter* associated with eggs and the environment of conventional cage and free-range egg production. *Poultry Science*, 91(5), 1195-1202. doi:<http://dx.doi.org/10.3382/ps.2011-01795>
- Jones, D. R., Cox, N. A., Guard, J., Fedorka-Cray, P. J., Buhr, R. J., Gast, R. K., . . . Makagon, M. M. (2015). Microbiological impact of three commercial laying hen housing systems. *Poultry Science*, 94(3), 544-551. doi:<http://dx.doi.org/10.3382/ps/peu010>
- Jones, D. R., Guard, J., Gast, R. K., Buhr, R. J., Fedorka-Cray, P. J., Abdo, Z., . . . Karcher, D. M. (2016). Influence of commercial laying hen housing systems on the incidence and identification of *Salmonella* and *Campylobacter*. *Poultry Science*, 95(5), 1116-1124. doi:<http://dx.doi.org/10.3382/ps/pew036>
- Jones, F. T., Rives, D. V., & Carey, J. B. (1995). *Salmonella* contamination in commercial eggs and an egg production facility. *Poultry Science*, 74(4), 753-757. doi:<http://dx.doi.org/10.3382/ps.0740753>
- Jouy, E., Proux, K., Humbert, F., Rose, V., Lalande, F., Houdayer, C., . . . Salvat, G. (2005). Evaluation of a French ELISA for the detection of *Salmonella Enteritidis* and *Salmonella Typhimurium* in flocks of laying and breeding hens. *Preventive Veterinary Medicine*, 71(1/2), 91-103. doi:<http://dx.doi.org/10.1016/j.prevetmed.2005.06.003>
- Kahya, S., Eyigor, A., & Carl, K. T. (2013). Comparison of different sample types for *Salmonella* detection from chicken layer breeder flocks. *Veteriner Fakultesi Dergisi, Uludag Universitesi*, 32(2), 19-24. Retrieved from <http://veteriner.uludag.edu.tr>
- Kinde, H., Castellan, D. M., Kass, P. H., Ardans, A., Cutler, G., Breitmeyer, R. E., . . . Kuney, D. R. (2004). The occurrence and distribution of *Salmonella enteritidis* and other serovars on California egg laying premises: a comparison of two sampling methods and two culturing techniques. *Avian Diseases*, 48(3), 590-594. doi:<http://dx.doi.org/10.1637/7165-021104R>
- Kinde, H., Castellan, D. M., Kerr, D., Campbell, J., Breitmeyer, R., & Ardans, A. (2005). Longitudinal monitoring of two commercial layer flocks and their environments for *Salmonella enterica*

- serovar Enteritidis and other salmonellae. *Avian Diseases*, 49(2), 189-194. doi:<http://dx.doi.org/10.1637/7228-062704R>
- Kinde, H., Goodluck, H. A., Pitesky, M., Friend, T. D., Campbell, J. A., & Hill, A. E. (2015). Validation of single and pooled manure drag swabs for the detection of *Salmonella* serovar Enteritidis in commercial poultry houses. *Avian Diseases*, 59(4), 548-553. doi:<http://dx.doi.org/10.1637/11224-063015-ResNote.1>
- Kinde, H., Read, D. H., Chin, R. P., Bickford, A. A., Walker, R. L., Ardans, A., . . . Gardner, I. A. (1996). *Salmonella* enteritidis, phage type 4 infection in a commercial layer flock in southern California: bacteriologic and epidemiologic findings. *Avian Diseases*, 40(3), 665-671. doi:<http://dx.doi.org/10.2307/1592279>
- Kingsbury, J. M., Thom, K., Erskine, H., Olsen, L., & Soboleva, T. (2019). Prevalence and genetic analysis of *Salmonella enterica* from a cross-sectional survey of the New Zealand egg production environment. *Journal of Food Protection*, 82(12), 2201-2214. Retrieved from <https://jfoodprotection.org/doi/abs/10.4315/0362-028X.JFP-19-159>
- Klinkenberg, D., Thomas, E., Artavia, F. F. C., & Bouma, A. (2011). *Salmonella* enteritidis surveillance by egg immunology: impact of the sampling scheme on the release of contaminated table eggs. *Risk Analysis*, 31(8), 1260-1270. doi:<http://dx.doi.org/10.1111/j.1539-6924.2011.01582.x>
- Kottwitz, L. B. M., Back, A., Leao, J. A., Frausto, H. S. E., Magnani, M., & Oliveira, T. C. R. M. d. (2013). Decline of *Salmonella* Enteritidis in poultry. *British Food Journal*, 115(11), 1541-1546. doi:<http://dx.doi.org/10.1108/BFJ-04-2012-0086>
- Koutsoumanis, K., Allende, A., Alvarez-Ordóñez, A., Bolton, D., Bover-Cid, S., Chemaly, M., . . . Davies, R. (2019). *Salmonella* control in poultry flocks and its public health impact. *EFSA Journal*, 17(2), e05596. Retrieved from <https://efsa.onlinelibrary.wiley.com/doi/full/10.2903/j.efsa.2019.5596>
- Leon-Velarde, C. G., Cai, H. Y., Larkin, C., Bell-Rogers, P., Stevens, R. W. C., & Odumeru, J. A. (2004). Evaluation of methods for the identification of *Salmonella enterica* serotype Typhimurium [S. typhimurium] DT104 from poultry environmental samples. *Journal of Microbiological Methods*, 58(1), 79-86. doi:<http://dx.doi.org/10.1016/j.mimet.2004.03.005>
- Li, X., Liu, L., Li, Q., Xu, G., & Zheng, J. (2018). *Salmonella* contamination in layer farms in China: detection and genetic analysis. *Journal of Poultry Science*, 55(1), 1-9. doi:<http://dx.doi.org/10.2141/jpsa.0160144>
- Lopašovský, L., Zelenáková, L., Fikselová, M., Bobková, A., Kunová, S., Bobko, M., & Šnirc, M. (2015). The prevalence of *Salmonella* infections in laying hen flocks producing eggs and their impact on the public health. *Potravinárstvo*, 9(1), 228-236. doi:10.5219/461
- Mahe, A., Bougeard, S., Huneau-Salaun, A., Bouquin, S. I., Petetin, I., Rouxel, S., . . . Rose, N. (2008). Bayesian estimation of flock-level sensitivity of detection of *Salmonella* spp., Enteritidis and Typhimurium according to the sampling procedure in French laying-hen houses. *Preventive Veterinary Medicine*, 84(1/2), 11-26. doi:<http://dx.doi.org/10.1016/j.prevetmed.2007.10.003>
- Matsumoto, A., Miyama, M., & Murakami, S. (2001). Comparison of *Salmonella* isolation rates in different types of egg-layer hen houses in Chiba, Japan. *Avian Diseases*, 45(1), 195-200. doi:<http://dx.doi.org/10.2307/1593028>
- McWhorter, A. R., & Chousalkar, K. K. (2020). *Salmonella* on Australian cage egg farms: observations from hatching to end of lay. *Food Microbiology*, 87, 103384. doi:<http://dx.doi.org/10.1016/j.fm.2019.103384>
- McWhorter, A. R., Davos, D., & Chousalkar, K. K. (2015). Pathogenicity of *Salmonella* strains isolated from egg shells and the layer farm environment in Australia. *Applied and Environmental Microbiology*, 81(1), 405-414. doi:<http://dx.doi.org/10.1128/AEM.02931-14>
- Moffatt, C. R. M., Musto, J., Pingault, N., Combs, B., Miller, M., Stafford, R., . . . Kirk, M. D. (2017). Recovery of *Salmonella enterica* from Australian layer and processing environments following outbreaks linked to eggs. *Foodborne Pathogens and Disease*, 14(8), 478-482. doi:<http://dx.doi.org/10.1089/fpd.2016.2268>

- Moraes, D. M. C., Andrade, M. A., Duarte, S. C., Bastos, T. S. A., Arnhold, E., Jayme, V. d. S., & Nunes, I. A. (2016). Phenotypic and molecular detection of *Salmonella* sp. on growing, rearing and production phases in a commercial group of laying hens. *Pesquisa Veterinaria Brasileira*, 36(6), 503-508. Retrieved from [http://130.211.64.33/pdf\\_artigos/07-06-2016\\_18-18Vet%202133\\_4102hH%20LD.pdf](http://130.211.64.33/pdf_artigos/07-06-2016_18-18Vet%202133_4102hH%20LD.pdf)
- Murakami, K., Horikawa, K., Ito, T., & Otsuki, K. (2001). Environmental survey of salmonella and comparison of genotypic character with human isolates in Western Japan. *Epidemiology and Infection*, 126(2), 159-171. doi:<http://dx.doi.org/10.1017/S0950268801005283>
- Murase, T., Miyahara, S., Sato, T., Otsuki, K., & Holt, P. S. (2006). Isolation of *Salmonella* organisms from commercial layer houses where the flocks were molted with a wheat bran diet. *Journal of Applied Poultry Research*, 15(1), 116-121. doi:<http://dx.doi.org/10.1093/japr/15.1.116>
- Murase, T., Senjyu, K., Maeda, T., Tanaka, M., Sakae, H., Matsumoto, Y., . . . Otsuki, K. (2001). Monitoring of chicken houses and an attached egg-processing facility in a laying farm for *Salmonella* contamination between 1994 and 1998. *Journal of Food Protection*, 64(12), 1912-1916.
- Mutalib, A., McDonough, P., Shin, S., Patten, V., & Lein, D. (1992). *Salmonella* enteritidis in commercial layer farms in New York state; environmental survey results and significance of available monitoring tests. *Journal of Veterinary Diagnostic Investigation*, 4(4), 416-418.
- Pajic, M., Todorovic, D., Velhner, M., Milanov, D., Polacek, V., uric, S., & Stojanov, I. (2015). The epizootiological importance of *Salmonella* spp. isolated in various aspects of poultry production in the Southern Backa and Srem region. *Arhiv Veterinarske Medicine*, 8(1), 67-76. Retrieved from <http://niv.ns.ac.rs/wp-content/uploads/2015/12/7.Pajic.pdf>
- Pieskus, J., Kazeniauskas, E., Butrimaite-Ambrozeviciene, C., Stanevicius, Z., & Mauricas, M. (2008). *Salmonella* incidence in broiler and laying hens with the different housing systems. *Journal of Poultry Science*, 45(3), 227-231. doi:<http://dx.doi.org/10.2141/jpsa.45.227>
- Pitesky, M., Charlton, B., Bland, M., & Rolfe, D. (2013). Surveillance of *Salmonella* Enteritidis in layer houses: a retrospective comparison of the Food and Drug Administration's Egg Safety Rule (2010-2011) and the California Egg Quality Assurance Program (2007-2011). *Avian Diseases*, 57(1), 51-56. doi:<http://dx.doi.org/10.1637/10281-061312-Reg.1>
- Poppe, C., Irwin, R. J., Forsberg, C. M., Clarke, R. C., & Oggel, J. (1991). The prevalence of *Salmonella* enteritidis and other *Salmonella* spp. among Canadian registered commercial layer flocks. *Epidemiology and Infection*, 100(2), 259-270. doi:<http://dx.doi.org/10.1017/S0950268800048408>
- Pulido-Landinez, M., Sanchez-Ingunza, R., Guard, J., & Nascimento, V. P. d. (2014). Presence of *Salmonella* Enteritidis and *Salmonella* Gallinarum in commercial laying hens diagnosed with fowl typhoid disease in Colombia. *Avian Diseases*, 58(1), 165-170. doi:<http://dx.doi.org/10.1637/10598-062613-Case.1>
- Rodriguez, R., Fandino, C., Donado, P., Guzman, L., & Verjan, N. (2015). Characterization of *Salmonella* from commercial egg-laying hen farms in a central region of Colombia. *Avian Diseases*, 59(1), 57-63. doi:<http://dx.doi.org/10.1637/10873-052714-Reg>
- Salazar, G. A., Guerrero-López, R., Lalaleo, L., Avilés-Esquível, D., Vinueza-Burgos, C., & Calero-Cáceres, W. (2019). Presence and diversity of *Salmonella* isolated from layer farms in central Ecuador. *F1000Research*, 8. doi:10.12688/f1000research.18233.2
- Saravanan, S., Purushothaman, V., Murthy, T. R., Sukumar, K., Srinivasan, P., Gowthaman, V., . . . Kuchipudi, S. V. (2015). Molecular Epidemiology of Nontyphoidal *Salmonella* in Poultry and Poultry Products in India: Implications for Human Health. *Indian J Microbiol*, 55(3), 319-326. doi:10.1007/s12088-015-0530-z
- Sasaki, Y., Murakami, M., Maruyama, N., Tsujiyama, Y., Kusukawa, M., Asai, T., & Yamada, Y. (2012). Risk factors for *Salmonella* prevalence in laying-hen farms in Japan. *Epidemiology and Infection*, 140(6), 982-990. doi:<http://dx.doi.org/10.1017/S0950268811001506>
- Sasipreeyajan, J., Jerngklinchan, J., Koowatananukul, C., & Saitanu, K. (1996). Prevalence of salmonellae in broiler, layer and breeder flocks in Thailand. *Tropical Animal Health and Production*, 28(2), 174-180. doi:<http://dx.doi.org/10.1007/BF03030841>



- Schulz, J., Hoorebeke, S. v., Hald, B., Hartung, J., Immerseel, F. v., Radtke, I., . . . Dewulf, J. (2011). The dynamics of Salmonella occurrence in commercial laying hen flocks throughout a laying period. *Avian Pathology*, 40(3), 243-248. doi:<http://dx.doi.org/10.1080/03079457.2010.544290>
- Sevilla-Navarro, S., Marin, C., Cortes, V., Garcia, C., Vega, S., & Catala-Gregori, P. (2018). Autophagy as a control measure for Salmonella in laying hens. *Poultry Science*, 97(12), 4367-4373. Retrieved from <https://academic.oup.com/ps/article-abstract/97/12/4367/5049877>
- Sharma, P., Caraguel, C., Sexton, M., McWhorter, A., Underwood, G., Holden, K., & Chousalkar, K. (2018). Shedding of Salmonella Typhimurium in vaccinated and unvaccinated hens during early lay in field conditions: a randomised controlled trial. *BMC Microbiology*, 18(1), 78. doi:10.1186/s12866-018-1201-0
- Sharma, S., Fowler, P. D., Pant, D. K., Singh, S., & Wilkins, M. J. (2021). Prevalence of non-typhoidal Salmonella and risk factors on poultry farms in Chitwan, Nepal. *Veterinary World*, 14(2), 426-436. doi:<http://dx.doi.org/10.14202/vetworld.2021.426-436>
- Sheldon, B. W., Li, X., Payne, J. B., Santos, F. B. O., & Anderson, K. E. (2006). Surveillance of Salmonella populations, prevalence and serotype diversity in layer feces as a function of production cycle and molting. *EPC 2006 - 12th European Poultry Conference, Verona, Italy, 10-14 September, 2006*, paper-293.
- Shirota, K., Umali, D. V., Suzuki, T., & Katoh, H. (2012). Epizootiologic role of feeds in the epidemiology of Salmonella Senftenberg contamination in commercial layer farms in eastern Japan. *Avian Diseases*, 56(3), 516-520. doi:<http://dx.doi.org/10.1637/9964-101611-Reg.1>
- Singh, R., Yadav, A. S., Tripathi, V., & Singh, R. P. (2013). Antimicrobial resistance profile of Salmonella present in poultry and poultry environment in north India. *Food Control*, 33(2), 545-548. doi:<https://doi.org/10.1016/j.foodcont.2013.03.041>
- Sivaramalingam, T., McEwen, S. A., Pearl, D. L., Ojkic, D., & Guerin, M. T. (2013). A temporal study of Salmonella serovars from environmental samples from poultry breeder flocks in Ontario between 1998 and 2008. *Canadian Journal of Veterinary Research*, 77(1), 1-11. Retrieved from <http://www.ingentaconnect.com/content/cvma/cjvr/2013/00000077/00000001/art00001>
- Snow, L. C., Davies, R. H., Christiansen, K. H., Carrique-Mas, J. J., Wales, A. D., O'Connor, J. L., . . . Evans, S. J. (2007). Survey of the prevalence of Salmonella species on commercial laying farms in the United Kingdom. *Veterinary Record*, 161(14), 471-476. Retrieved from <http://veterinaryrecord.bvapublications.com/archive/>
- Sodagari, H. R., Habib, I., Whiddon, S., Wang, P., Mohammed, A. B., Robertson, I., & Goodchild, S. (2020). Occurrence and characterization of Salmonella isolated from table egg layer farming environments in Western Australia and insights into biosecurity and egg handling practices. *Pathogens*, 9(1). doi:10.3390/pathogens9010056
- Soria, M. C., Soria, M. A., Bueno, D. J., Godano, E. I., Gomez, S. C., ViaButron, I. A., . . . Roge, A. D. (2017). Salmonella spp. contamination in commercial layer hen farms using different types of samples and detection methods. *Poultry Science*, 96(8), 2820-2830. doi:<http://dx.doi.org/10.3382/ps/pex053>
- St. Amand, J. A., Cassis, R., King, R. K., & Christianson, C. B. A. (2017). Prevalence of Salmonella spp. in environmental samples from table egg barns in Alberta. *Avian Pathology*, 46(6), 594-601. doi:<http://dx.doi.org/10.1080/03079457.2017.1311989>
- Stocki, S. L., Annett, C. B., Sibley, C. D., McLaws, M., Checkley, S. L., Singh, N., . . . White, A. P. (2007). Persistence of Salmonella on egg conveyor belts is dependent on the belt type but not on the rdar morphotype. *Poultry Science*, 86(11), 2375-2383. doi:<http://dx.doi.org/10.3382/ps.2007-00121>
- Sylejmani, D., Musliu, A., Ramadani, N., Sparagano, O., & Hamidi, A. (2016). Associations between the level of biosecurity and occurrence of Dermanyssus gallinae and Salmonella spp. in layer farms. *Avian Diseases*, 60(2), 454-459. Retrieved from <http://www.bioone.org/loi/avdi>
- Trawinska, B., Saba, L., Wdowiak, L., Ondrasovicova, O., & Nowakowicz-Debek, B. (2008). Evaluation of Salmonella rod incidence in poultry in the Lublin Province over the years 2001-2005. *Annals*

- of *Agricultural and Environmental Medicine*, 15(1), 131-134. Retrieved from <http://www.aaem.pl/pdf/15131.pdf>
- Van Hoorebeke, S., Van Immerseel, F., De Vylder, J., Ducatelle, R., Haesebrouck, F., Pasmans, F., . . . Dewulf, J. (2009). Faecal sampling underestimates the actual prevalence of Salmonella in laying hen flocks. *Zoonoses Public Health*, 56(8), 471-476. doi:10.1111/j.1863-2378.2008.01211.x
- Van Hoorebeke, S., Van Immerseel, F., Schulz, J., Hartung, J., Harisberger, M., Barco, L., . . . Dewulf, J. (2010). Determination of the within and between flock prevalence and identification of risk factors for Salmonella infections in laying hen flocks housed in conventional and alternative systems. *Prev Vet Med*, 94(1-2), 94-100. doi:10.1016/j.prevetmed.2009.11.022
- Wales, A., Breslin, M., & Davies, R. (2006a). Assessment of cleaning and disinfection in Salmonella-contaminated poultry layer houses using qualitative and semi-quantitative culture techniques. *Veterinary Microbiology*, 116(4), 283-293. doi:10.1016/j.vetmic.2006.04.026
- Wales, A., Breslin, M., & Davies, R. (2006b). Semiquantitative assessment of the distribution of Salmonella in the environment of caged layer flocks. *Journal of Applied Microbiology*, 101(2), 309-318. doi:<http://dx.doi.org/10.1111/j.1365-2672.2006.02916.x>
- Wallner-Pendleton, E. A., Patterson, P. H., Kariyawasam, S., Trampel, D. W., & Denagamage, T. (2014). On-farm risk factors for Salmonella Enteritidis contamination. *Journal of Applied Poultry Research*, 23(2), 345-352. doi:<http://dx.doi.org/10.3382/japr.2014-00943>
- White, P. L., Schlosser, W., Benson, C. E., Maddox, C., & Hogue, A. (1997). Environmental survey by manure drag sampling for Salmonella enteritidis in chicken layer houses. *Journal of Food Protection*, 60(10), 1189-1193.
- Wilson, A., Chandry, P. S., Turner, M. S., Courtice, J. M., & Fegan, N. (2021). Comparison between cage and free-range egg production on microbial composition, diversity and the presence of Salmonella enterica. *Food Microbiology*, 97. doi:<http://dx.doi.org/10.1016/j.fm.2021.103754>
- Yamane, Y., Leonard, J. D., Kobatake, R., Awamura, N., Toyota, Y., Ohta, H., . . . Inoue, T. (2000). A case study on Salmonella enteritidis (SE) origin at three egg-laying farms and its control with a S. enteritidis bacterin. *Avian Diseases*, 44(3), 519-526. doi:<http://dx.doi.org/10.2307/1593090>
- Zhang, L., Yan, Z., & Ryser, E. T. (2006). Comparison of the reveal test, the U.S. Food and Drug Administration culture method, and selective media for recovery of Salmonella enteritidis from commercial egg layer flock environments. *Journal of Food Protection*, 69(11), 2766-2769. Retrieved from <http://www.foodprotection.org>
- Zijpp, A. J. v. d., Mollenhorst, H., Berentsen, P. B. M., & Boer, I. J. M. d. (2006). Alternatives for the battery cage system: a comparison of economic, environmental and societal performance. *EPC 2006 - 12th European Poultry Conference, Verona, Italy, 10-14 September, 2006*, paper-206.
